# Supplementary material for: Metasychis varicollaris sp. nov. and report of Metasychis gotoi (Maldanidae, Annelida) from the China Seas
Source: PeerJ. 2021 Feb 18;9:e10608. doi: 10.7717/peerj.10608 (PMC7897410; doi:10.7717/peerj.10608)
Supplement: Supplemental Information 3 [file peerj-09-10608-s003.xlsx]

## Sheet: Sheet1
species name	location	accession number	latitude	longitude
Metasychis gotoi	China	MBM 006305	35.75	120.25	Note. NA：missing data
Metasychis gotoi	China	MBM 006306	39.5	120.967
Metasychis gotoi	China	MBM 006307	31	123
Metasychis gotoi	China	MBM 006310	31.75	122.75
Metasychis gotoi	China	MBM 006311	29	122.25
Metasychis gotoi	China	MBM 006312	20.25	111.5
Metasychis gotoi	China	MBM 006317	39.5833	119.85
Metasychis gotoi	China	MBM 006320	31.5	123
Metasychis gotoi	Vietnam	MBM 006347	20.5	108
Metasychis gotoi	China	MBM 006355	18	110.5
Metasychis gotoi	China	MBM 006412	38.0333	121.833
Metasychis gotoi	China	MBM 007966	40.1	120.533
Metasychis gotoi	China	MBM 007967	29	122.25
Metasychis gotoi	China	MBM 008113	17	108.5
Metasychis gotoi	China	MBM 008119	21	115.5
Metasychis gotoi	China	MBM 008138	20	111.25
Metasychis gotoi	China	MBM 012498	38.9833	122.85
Metasychis gotoi	China	MBM 012518	18.25	111
Metasychis gotoi	China	MBM 012564	40.1667	121.8
Metasychis gotoi	China	MBM 012565	21.5	115
Metasychis gotoi	China	MBM 012566	19	110.75
Metasychis gotoi	China	MBM 012569	31.5	123
Metasychis gotoi	China	MBM 012571	22.25	115
Metasychis gotoi	China	MBM 012573	21	114
Metasychis gotoi	China	MBM 012574	40.1	120.533
Metasychis gotoi	China	MBM 012577	21.5	114.5
Metasychis gotoi	China	MBM 012578	21.5	113.75
Metasychis gotoi	Vietnam	MBM 012579	17.5	107
Metasychis gotoi	China	MBM 012580	21.75	114.5
Metasychis gotoi	China	MBM 012582	31.25	122.75
Metasychis gotoi	China	MBM 012586	19.75	111.25
Metasychis gotoi	China	MBM 012588	20.5	111.5
Metasychis gotoi	China	MBM 012589	21	112.5
Metasychis gotoi	China	MBM 012590	17.5	110
Metasychis gotoi	China	MBM 012591	38.3667	119.9
Metasychis gotoi	China	MBM 012593	18.75	110.75
Metasychis gotoi	China	MBM 012603	39.6833	121.217
Metasychis gotoi	China	MBM 012604	29	124
Metasychis gotoi	China	MBM 012605	29	122.25
Metasychis gotoi	China	MBM 012606	17.75	110.5
Metasychis gotoi	China	MBM 012607	36	122
Metasychis gotoi	China	MBM 012611	19	110.75
Metasychis gotoi	China	MBM 012615	19.5	111.25
Metasychis gotoi	China	MBM 012616	29	124.5
Metasychis gotoi	China	MBM 012617	38.3167	120.533
Metasychis gotoi	China	MBM 012618	38.9833	122.85
Metasychis gotoi	China	MBM 012619	18.75	110.75
Metasychis gotoi	China	MBM 012621	33	122.25
Metasychis gotoi	China	MBM 012622	21	114
Metasychis gotoi	China	MBM 012623	20.5	111.5
Metasychis gotoi	China	MBM 012624	19	110.75
Metasychis gotoi	China	MBM 012625	22.7	115.75
Metasychis gotoi	China	MBM 012626	19	111
Metasychis gotoi	China	MBM 012628	18.25	110
Metasychis gotoi	NA	MBM 012630	NA	NA
Metasychis gotoi	China	MBM 012633	20.6667	108.5
Metasychis gotoi	China	MBM 012636	39.3	119.733
Metasychis gotoi	China	MBM 012640	31	123
Metasychis gotoi	China	MBM 012641	29.5	123.5
Metasychis gotoi	China	MBM 012642	36	120.75
Metasychis gotoi	China	MBM 012643	39.3	119.733
Metasychis gotoi	China	MBM 012646	19.75	111.25
Metasychis gotoi	China	MBM 012648	22	115
Metasychis gotoi	China	MBM 012650	18.5	110.5
Metasychis gotoi	China	MBM 012651	21.75	115
Metasychis gotoi	China	MBM 012652	19.75	108.75
Metasychis gotoi	China	MBM 012654	20	111.25
Metasychis gotoi	China	MBM 012655	29	124
Metasychis gotoi	China	MBM 012657	29	124
Metasychis gotoi	China	MBM 012660	39.1	120.6
Metasychis gotoi	China	MBM 012664	21	112
Metasychis gotoi	China	MBM 012665	20	111.5
Metasychis gotoi	China	MBM 012668	21.25	109.403
Metasychis gotoi	China	MBM 012669	22	115.5
Metasychis gotoi	China	MBM 012670	18.5	110.5
Metasychis gotoi	China	MBM 012675	39.2167	121.083
Metasychis gotoi	China	MBM 012677	21.75	114.5
Metasychis gotoi	China	MBM 012679	20	111.25
Metasychis gotoi	China	MBM 012681	39.2167	121.083
Metasychis gotoi	China	MBM 012685	20	111.5
Metasychis gotoi	China	MBM 012686	22	115.5
Metasychis gotoi	China	MBM 012687	21.75	114.5
Metasychis gotoi	China	MBM 012708	21.75	114.5
Metasychis gotoi	China	MBM 012715	21.75	114.5
Metasychis gotoi	China	MBM 012730	17.75	110
Metasychis gotoi	China	MBM 201449	20.1667	109
Metasychis gotoi	China	MBM 201450	20.1667	109
Metasychis gotoi	China	MBM 201451	20.1667	109
Metasychis gotoi	NA	MBM 201452	NA	NA
Metasychis gotoi	China	MBM 201453	19.5	108.5
Metasychis gotoi	Vietnam	MBM 201454	19.9167	106.75
Metasychis gotoi	Vietnam	MBM 201455	17.5	107
Metasychis gotoi	Vietnam	MBM 201457	20.75	108
Metasychis gotoi	China	MBM 201458	19.75	108
Metasychis gotoi	China	MBM 201459	19.5	108
Metasychis gotoi	Vietnam	MBM 201460	18.5	107
Metasychis gotoi	China	MBM 201461	19	107.5
Metasychis gotoi	Vietnam	MBM 201463	20.75	108
Metasychis gotoi	China	MBM 201466	19.75	108.75
Metasychis gotoi	China	MBM 201475	20.75	108.5
Metasychis gotoi	China	MBM 201476	20	109
Metasychis gotoi	China	MBM 201477	20.75	108.5
Metasychis gotoi	China	MBM 201478	21.5	108.5
Metasychis gotoi	China	MBM 201479	20.75	108.5
Metasychis gotoi	China	MBM 201480	20.75	108.5
Metasychis gotoi	China	MBM 201481	20.75	108.5
Metasychis gotoi	China	MBM 201482	19.75	108.75
Metasychis gotoi	China	MBM 201483	20.25	109
Metasychis gotoi	China	MBM 201484	20.5	108.5
Metasychis gotoi	China	MBM 201485	19.75	108.5
Metasychis gotoi	Vietnam	MBM 201486	21	108
Metasychis gotoi	Vietnam	MBM 201487	20.75	108
Metasychis gotoi	China	MBM 201488	20.25	109
Metasychis gotoi	China	MBM 201489	19.5	108.5
Metasychis gotoi	China	MBM 201490	19.75	108.5
Metasychis gotoi	China	MBM 201491	20.5	108.5
Metasychis gotoi	Vietnam	MBM 201492	20.75	108

## Sheet: Sheet2
latitude	longitude	latitude	longitude
		17	107
17	108.5	17	108.5
17.5	107	17.5	107
17.5	107	17.5	107
17.5	110	17.5	110
17.75	110	17.75	110
17.75	110.5	17.75	110.5
18	110.5	18	110.5
18.25	110	18.25	110
18.25	111	18.25	111
18.5	107	18.5	107
18.5	110.5	18.5	110.5
18.5	110.5	18.5	110.5
18.75	110.75	18.75	110.75
18.75	110.75	18.75	110.75
19	107.5	19	107.5
19	110.75	19	110.75
19	110.75	19	110.75
19	110.75	19	110.75
19	111	19	111
19.5	108	19.5	108
19.5	108.5	19.5	108.5
19.5	108.5	19.5	108.5
19.5	111.25	19.5	111.25
19.75	108	19.75	108
19.75	108.5	19.75	108.5
19.75	108.5	19.75	108.5
19.75	108.75	19.75	108.75
19.75	108.75	19.75	108.75
19.75	108.75	19.75	108.75
19.75	111.25	19.75	111.25
19.75	111.25	19.75	111.25
19.9167	106.75	19.9167	106.75
20	109	20	109
20	111.25	20	111.25
20	111.25	20	111.25
20	111.25
20	111.5	20	111.5
20	111.5	20	111.5
20.1667	109	20.1667	109
20.1667	109	20.1667	109
20.1667	109	20.1667	109
20.25	109	20.25	109
20.25	109	20.25	109
20.25	111.5	20.25	111.5
20.5	108	20.5	108
20.5	108.5	20.5	108.5
20.5	108.5	20.5	108.5
20.5	111.5
		20.5	109
20.5	111.5	20.5	111.5
20.6667	108.5	20.6667	108.5
20.75	108	20.75	108
20.75	108	20.75	108
20.75	108	20.75	108
20.75	108	20.75	108
20.75	108.5	20.75	108.5
20.75	108.5	20.75	108.5
20.75	108.5	20.75	108.5
20.75	108.5	20.75	108.5
20.75	108.5	20.75	108.5
21	108	20.75	111.5
21	112	21	108
21	112.5	21	112
21	113	21	112.5
21	114	21	114
21	114	21	114
21	115.5	21	115.5
21.25	109.403	21.25	109.403
21.5	108.5	21.5	108.5
21.5	113.75	21.5	113.75
21.5	114.5	21.5	114.5
21.5	115	21.5	115
21.75	114.5	21.75	114.5
21.75	114.5	21.75	114.5
21.75	114.5	21.75	114.5
21.75	114.5	21.75	114.5
21.75	114.5	21.75	114.5
21.75	115	21.75	115
22	115	22	115
22	115.5	22	115
22	115.5	22	115.5
22.25	115	22	115.5
22.7	115.75	22.25	115
29	122.25	22.7	115.75
29	122.25	29	122.25
29	122.25	29	122.25
29	124	29	122.25
29	124	29	124
29	124	29	124
29	124.5	29	124
29.5	123.5	29.5	123.5
31	123	31	123
31	123	31	123
31.25	122.75	31.25	122.75
31.5	123	31.5	123
31.5	123	31.5	123
31.75	122.75	31.75	122.75
33	122.25	33	122.25
35.75	120.25	35.75	120.25
36	120.75	36	120.75
36	122	36	122
38.0333	121.833	38.0333	121.833
38.3167	120.533	38.3167	120.533
38.3667	119.9	38.3667	119.9
38.9833	122.85	38.9833	122.85
38.9833	122.85	38.9833	122.85
39.1	120.6	39.1	120.6
39.2167	121.083	39.2167	121.083
39.2167	121.083	39.2167	121.083
39.3	119.733	39.3	119.733
39.3	119.733	39.3	119.733
39.5	120.967	39.5	120.967
39.5833	119.85	39.6833	121.217
39.6833	121.217	40.1	120.533
40.1	120.533	40.1	120.533
40.1	120.533	40.1667	121.8
40.1667	121.8
NA	NA

## Sheet: Sheet3
latitude	longitude
17	107
17	108.5
17.5	107
17.5	107
17.5	110
17.75	110
17.75	110.5
18	110.5
18.25	110
18.25	111
18.5	107
18.5	110.5
18.5	110.5
18.75	110.75
18.75	110.75
19	107.5
19	110.75
19	110.75
19	110.75
19	111
19.5	108
19.5	108.5
19.5	108.5
19.5	111.25
19.75	108
19.75	108.5
19.75	108.5
19.75	108.75
19.75	108.75
19.75	108.75
19.75	111.25
19.75	111.25
19.9167	106.75
20	109
20	111.25
20	111.25
20	111.5
20	111.5
20.1667	109
20.1667	109
20.1667	109
20.25	109
20.25	109
20.25	111.5
20.5	108
20.5	108.5
20.5	108.5
20.5	109
20.5	111.5
20.6667	108.5
20.75	108
20.75	108
20.75	108
20.75	108
20.75	108.5
20.75	108.5
20.75	108.5
20.75	108.5
20.75	108.5
20.75	111.5
21	108
21	112
21	112.5
21	114
21	114
21	115.5
21.25	109.403
21.5	108.5
21.5	113.75
21.5	114.5
21.5	115
21.75	114.5
21.75	114.5
21.75	114.5
21.75	114.5
21.75	114.5
21.75	115
22	115
22	115
22	115.5
22	115.5
22.25	115
22.7	115.75
29	122.25
29	122.25
29	122.25
29	124
29	124
29	124
29.5	123.5
31	123
31	123
31.25	122.75
31.5	123
31.5	123
31.75	122.75
33	122.25
35.75	120.25
36	120.75
36	122
38.0333	121.833
38.3167	120.533
38.3667	119.9
38.9833	122.85
38.9833	122.85
39.1	120.6
39.2167	121.083
39.2167	121.083
39.3	119.733
39.3	119.733
39.5	120.967
39.6833	121.217
40.1	120.533
40.1	120.533
40.1667	121.8
